# Supplementary material for: Probing the Limits to MicroRNA-Mediated Control of Gene Expression
Source: PLOS journal article supplement (doi:10.1371/journal.pcbi.1004715), 2016-01-26
Supplement: S4 (10.1371/journal.pcbi.1004715.s004) [file journal.pcbi.1004715.s004]

**S1 Text. Capacity of a Poissonian channel.** In the absence of miRNA molecules, fluctuations in TF-channel are Poissonian (i.e. the corresponding FF is one). In such a case, the channel capacity (see Eq. 21) is given by

$$\begin{aligned} I_{\text{opt}} &= \log_2 \frac{1}{\sqrt{2\pi e}} \int_{f_j^{\min}}^{f_j^{\max}} \frac{1}{\sqrt{\bar{m}_2}} \frac{d\bar{m}_2}{df_j} df_j = \log_2 \frac{1}{\sqrt{2\pi e}} \int_{m_2^{\min}}^{m_2^{\max}} \frac{d\bar{m}_2}{\sqrt{\bar{m}_2}} = \\ &= \log_2 \left( \sqrt{m_2^{\max}} - \sqrt{m_2^{\min}} \right) - \frac{1}{2} \log_2 \frac{\pi e}{2} \ , \end{aligned}$$

where  $m_2^{\min} = \bar{m}_2(f_j^{\min})$  and  $m_2^{\max} = \bar{m}_2(f_j^{\max})$  are the minimum and maximum expression levels of the target.
